# Supplementary material for: Imputing Variants in HLA-DR Beta Genes Reveals That HLA-DRB1 Is Solely Associated with Rheumatoid Arthritis and Systemic Lupus Erythematosus
Source: PubMed Central journal article supplement (PMC4769216; doi:10.1371/journal.pone.0150283), 2016-02-26
Supplement: pone.0150283.s002.pdf [file pone.0150283.s002.pdf]

**S1 Table.** Results for association of *HLA-DRB* haplotypes with RA susceptibility

| DRB-allele haplotype* | RA; n (%)    | Control; n (%) | OR (95% CI)      | P        |
|-----------------------|--------------|----------------|------------------|----------|
| DRB1*0101             | 319 (7.14)   | 847 (6.02)     | 1.09 (0.89-1.34) | 0.406    |
| DRB1*0301 - DRB3*0202 | 48 (1.07)    | 276 (1.96)     | 0.73 (0.52-1.01) | 0.060    |
| DRB1*0403 - DRB4*0101 | 202 (4.52)   | 452 (3.21)     | 1.47 (1.22-1.77) | 4.53E-05 |
| DRB1*0405 - DRB4*0101 | 1069 (23.93) | 1356 (9.63)    | 3.26 (2.87-3.70) | 2.47E-73 |
| DRB1*0406 - DRB4*0101 | 166 (3.72)   | 868 (6.16)     | 0.67 (0.53-0.84) | 5.09E-04 |
| DRB1*0410 - DRB4*0101 | 37 (0.83)    | 55 (0.39)      | 1.42 (0.92-2.20) | 0.113    |
| DRB1*0701 - DRB4*0101 | 185 (4.14)   | 929 (6.6)      | 0.38 (0.29-0.49) | 6.76E-13 |
| DRB1*0802             | 49 (1.1)     | 370 (2.63)     | 0.45 (0.33-0.61) | 4.19E-07 |
| DRB1*0803             | 253 (5.66)   | 948 (6.73)     | 0.67 (0.57-0.78) | 5.90E-07 |
| DRB1*0901 - DRB4*0101 | 587 (13.14)  | 1415 (10.05)   | 1.48 (1.31-1.66) | 4.93E-11 |
| DRB1*1001             | 171 (3.83)   | 217 (1.54)     | 2.69 (2.14-3.37) | 2.07E-17 |
| DRB1*1101 - DRB3*0202 | 197 (4.41)   | 839 (5.96)     | 0.72 (0.61-0.85) | 1.19E-04 |
| DRB1*1201 - DRB3*0101 | 116 (2.6)    | 586 (4.16)     | 0.74 (0.60-0.92) | 5.74E-03 |
| DRB1*1202 - DRB3*0301 | 137 (3.07)   | 427 (3.03)     | 0.98 (0.80-1.20) | 0.826    |
| DRB1*1301 - DRB3*0101 | 16 (0.36)    | 204 (1.45)     | 0.28 (0.17-0.47) | 1.78E-06 |
| DRB1*1302 - DRB3*0301 | 221 (4.95)   | 1343 (9.54)    | 0.59 (0.47-0.74) | 2.81E-06 |
| DRB1*1401 - DRB3*0202 | 90 (2.01)    | 498 (3.54)     | 0.53 (0.42-0.67) | 1.32E-07 |
| DRB1*1403 - DRB3*0101 | 47 (1.05)    | 178 (1.26)     | 0.56 (0.40-0.78) | 6.30E-04 |
| DRB1*1405 - DRB3*0202 | 42 (0.94)    | 350 (2.49)     | 0.41 (0.29-0.57) | 1.16E-07 |
| DRB1*1501 - DRB5*0101 | 238 (5.33)   | 952 (6.76)     | 0.77 (0.66-0.90) | 9.86E-04 |
| DRB1*1502 - DRB5*0101 | 10 (0.22)    | 33 (0.23)      | 0.87 (0.42-1.79) | 0.698    |
| DRB1*1502 - DRB5*0102 | 126 (2.82)   | 446 (3.17)     | 1.35 (1.02-1.79) | 0.036    |
| DRB1*1602 - DRB5*0202 | 22 (0.49)    | 49 (0.35)      | 0.97 (0.58-1.63) | 0.904    |

\* Haplotypes with frequency > 0.1% in control groups are shown. Note: if the *HLA-DRB1* alleles \*01, \*08, or \*10 were present, none of the other three DRB genes were present on the same chromosome phase. In contrast, *HLA-DRB3* was present whenever alleles \*03, \*11, \*12, \*13, or \*14 of *HLA-DRB1* were present; *HLA-DRB4* was present whenever alleles \*04, \*07, or \*09 of *HLA-DRB1* were present; and *HLA-DRB5* was present whenever alleles \*15 or \*16 of *HLA-DRB1* were present. Please note that association results for low-frequency haplotypes (<1%) could be unreliable.

RA: rheumatoid arthritis; OR: odds ratio; CI: confidence interval.
