# Supplementary material for: Imputing Variants in HLA-DR Beta Genes Reveals That HLA-DRB1 Is Solely Associated with Rheumatoid Arthritis and Systemic Lupus Erythematosus
Source: PubMed Central journal article supplement (PMC4769216; doi:10.1371/journal.pone.0150283), 2016-02-26
Supplement: pone.0150283.s003.pdf [file pone.0150283.s003.pdf]

**S2 Table.** Results for association of *HLA-DRB* haplotypes with SLE susceptibility

| DRB-allele haplotype* | SLE; n (%)  | Control; n (%) | OR (95% CI)      | P        |
|-----------------------|-------------|----------------|------------------|----------|
| DRB1*0101             | 81 (4.77)   | 576 (6.41)     | 0.73 (0.58-0.93) | 9.98E-03 |
| DRB1*0301 - DRB3*0202 | 45 (2.65)   | 168 (1.87)     | 1.43 (1.02-2.00) | 0.039    |
| DRB1*0403 - DRB4*0101 | 39 (2.3)    | 302 (3.36)     | 0.68 (0.49-0.96) | 0.027    |
| DRB1*0405 - DRB4*0101 | 127 (7.48)  | 802 (8.92)     | 0.82 (0.67-1.00) | 0.046    |
| DRB1*0406 - DRB4*0101 | 45 (2.65)   | 490 (5.45)     | 0.47 (0.35-0.65) | 2.76E-06 |
| DRB1*0410 - DRB4*0101 | 32 (1.88)   | 136 (1.51)     | 1.30 (0.88-1.92) | 0.194    |
| DRB1*0701 - DRB4*0101 | 165 (9.72)  | 596 (6.63)     | 1.53 (1.27-1.83) | 6.17E-06 |
| DRB1*0802             | 48 (2.83)   | 212 (2.36)     | 1.21 (0.88-1.67) | 0.237    |
| DRB1*0803             | 176 (10.37) | 636 (7.08)     | 1.50 (1.26-1.79) | 5.30E-06 |
| DRB1*0901 - DRB4*0101 | 205 (12.07) | 918 (10.22)    | 1.21 (1.04-1.43) | 0.017    |
| DRB1*1001             | 25 (1.47)   | 154 (1.71)     | 0.85 (0.55-1.30) | 0.443    |
| DRB1*1101 - DRB3*0202 | 65 (3.83)   | 513 (5.71)     | 0.66 (0.51-0.86) | 1.89E-03 |
| DRB1*1201 - DRB3*0101 | 53 (3.12)   | 295 (3.28)     | 0.94 (0.70-1.27) | 0.692    |
| DRB1*1202 - DRB3*0301 | 22 (1.3)    | 279 (3.1)      | 0.40 (0.26-0.63) | 4.98E-05 |
| DRB1*1301 - DRB3*0101 | 30 (1.77)   | 148 (1.65)     | 1.07 (0.72-1.60) | 0.725    |
| DRB1*1302 - DRB3*0301 | 105 (6.18)  | 826 (9.19)     | 0.66 (0.53-0.81) | 1.07E-04 |
| DRB1*1401 - DRB3*0202 | 55 (3.24)   | 340 (3.78)     | 0.85 (0.63-1.13) | 0.258    |
| DRB1*1403 - DRB3*0101 | 27 (1.59)   | 235 (2.62)     | 0.59 (0.40-0.89) | 0.011    |
| DRB1*1405 - DRB3*0202 | 40 (2.36)   | 217 (2.41)     | 0.98 (0.70-1.37) | 0.916    |
| DRB1*1501 - DRB5*0101 | 218 (12.84) | 680 (7.57)     | 1.82 (1.54-2.14) | 1.10E-12 |
| DRB1*1502 - DRB5*0101 | 10 (0.59)   | 20 (0.22)      | 2.75 (1.28-5.92) | 9.66E-03 |
| DRB1*1502 - DRB5*0102 | 42 (2.47)   | 321 (3.57)     | 0.67 (0.49-0.93) | 0.016    |
| DRB1*1602 - DRB5*0202 | 27 (1.59)   | 80 (0.89)      | 1.75 (1.13-2.72) | 0.013    |

\* Haplotypes with frequency > 0.1% in control groups are shown. Note: if the *HLA-DRB1* alleles \*01, \*08, or \*10 were present, none of the other three DRB genes were present on the same chromosome phase. In contrast, *HLA-DRB3* was present whenever alleles \*03, \*11, \*12, \*13, or \*14 of *HLA-DRB1* were present; *HLA-DRB4* was present whenever alleles \*04, \*07, or \*09 of *HLA-DRB1* were present; and *HLA-DRB5* was present whenever alleles \*15 or \*16 of *HLA-DRB1* were present. Please note that association results for low-frequency haplotypes (<1%) could be unreliable.

SLE: systemic lupus erythematosus; OR: odds ratio; CI: confidence interval.
